# Supplementary material
Source: Research Square preprint supplement (doi:10.21203/rs.3.rs-9283682/v1)
Supplement: Supplementary file 1 [file 22c02f0dffa8006ee583cacb.docx]

**Appendix 1 – Search strategy**

Ovid search strategy (Medline (R) All, Embase, PsycINFO):

*Implementation*

1 Implementation Science/

2 Health Plan Implementation/

3 Implementation Research.ti,ab,kf.

4 Implementation Process.ti,ab,kf.

5 Implementation Strateg*.ti,ab,kf.

6 Implementation.mp.

7 ((implement* or implant*) adj2 (strateg* or intervention or service or science or research or stud*)).tw.

8 (knowledge adj2 (transfer or exchange or sharing or mobili*ation or translation or diffusion)).tw.

9 (utili*ation adj2 (knowledge or research)).tw.

10 ((behaviour change or willingness to change or accept* or roll out or change or adhere* or uptake or clinical guideline or education outreach or evidence or (evidence adj based) or evidence-based practice or pathway) adj3 (quality improv* or service improv* or health polic* or disseminat* or integrat* or institutionali*ation or implant* or implement*)).tw.

11 or/1-10

*Economic Evaluation*

12 Economics/

13 "Costs and Cost Analysis"/

14 Cost-Benefit Analysis/

15 Cost-Effectiveness Analysis/

16 economic.mp.

17 ((value of implement*) or (implement* value)).ti,ab,kf.

18 ((policy or service) adj (econom* or cost*)).tw.

19 (economic adj2 (initiative* or model*)).tw.

20 (cost* or cost-minimi* or cost-utilit* or health utilit* or economic evaluat* or economic review* or cost-outcome* or cost-analys*s or economic analys*s or budget* or impact analys*s or cost-effective* or cost-benefit or qaly* or cost-benefit analys*s or cost-effectiveness analys*s ).tw.

21 or/12-20

*HIV care*

22 HIV Infections/

23 HIV-1/

24 HIV-2/

25 Anti-HIV Agents/

26 HIV Seropositivity/

27 HIV Testing/

28 HIV Seroprevalence/

29 HIV Serosorting/

30 HIV.mp.

31 HIV patients.ti,ab,kf.

32 Acquired Immunodeficiency Syndrome/

33 (human immunodeficiency virus or human immunodeficiency virus infection or human immun* deficiency or acquired immun* deficiency).tw.

34 aids.mp

35 people living with HIV.tw.

36 patient-centered HIV care model.tw.

37 ((HIV or AIDS) adj care).tw.

38 pre-exposure prophylaxis.ti,ab,kf.

39 preexposure chemoprophylaxis.ti,ab,kf.

40 prep.ti,ab,kf.

41 (chemoprevention or chemoprophylaxis or chemo prophylaxis).ti,ab,kf.

42 Antiretroviral prophylaxis.ti,ab,kf.

43 Anti-Retroviral Agents/

44 Antiretroviral.mp.

45 Antiretroviral Therapy, Highly Active/

46 Antiretroviral therapy.ti,ab,kf.

47 ((test or test* or screening or mass screening or track* or detect* or prevent* or health protection or protect* or health promotion or treatment or treat* or management or manag* or adherence or medication adherence or patient-centered or patient-cent*) adj2 (HIV or AIDS)).tw.

48 or/22-47

*Implementation AND Economic Evaluation AND HIV*

49 11 and 21 and 48

50 49 not (exp animals/ not humans.sh.)

51 limit 50 to yr="1981-2024"

Other data bases (LILACS, EconLit, Web of Science)

1 (Implementation) AND (HIV)

2 Added language filter, if available. Language = eng, spa, por

3 Added data filter, if available. Year = "1981-2024"
