# Supplementary material
Source: Research Square preprint supplement (doi:10.21203/rs.3.rs-9283682/v1)
Supplement: Supplementary file 2 [file 3cd548d6fbe826c53476264e.docx]

**Table 2 – Evidence of the effectiveness and economic evaluation**

|  | **Cite** | **Perspective(s)** | **Time horizon(s)** | **Base year** | **Costing method** | **Outcomes** | **Economic Evaluation(s)** | **Results (USD)** | **Additional analysis** |
| --- | --- | --- | --- | --- | --- | --- | --- | --- | --- |
| **Prevention** | (26) | (Healthcare) provider | N/I | 2001 | InGr | N/A | CA | **Annual costs per intervention component ($)**: from 1,427 to 20,183 | Sensitivity analyses on costs and best/worst-case scenarios |
| [(29)](https://onlinelibrary.wiley.com/doi/full/10.1002/jia2.25296https:/researchonline.lshtm.ac.uk/id/eprint/4041/1/sti038547.pdf) | (Healthcare) provider | 2 years | 2006 | InGr | N/A | CA | **Annual cost**: 16,759,189 | Sensitivity analysis on costs. |
| (25) | (Healthcare) provider | 15 years | 2015 | Top-down | HIV infections averted per 100 patients: 5.95  Average DALYs averted: 0.5 | CEA, CU | **Cost per infection averted ($)**: -806 to -493  **Cost per DALYs averted ($)**: 71 to 143 | Sensitivity analyses (ART costs, coverage, time horizon, and more) |
| (30) | (Healthcare) provider | 5 years | 2014 | InGr | HIV incidence reduction (%): 63 to 79 | CEA | **Cost per infection averted ($)**: 659 | Sensitivity analysis on intervention effectiveness and inverse probability weighting |
| (35) | (Healthcare) provider | 1 year | 2017 | InGr | N/I | CA | **Annual costs ($):** 204,253  **Monthly cost per patient in PrEP ($)**: 27 | Sensitivity analysis on uptake and retention. |
| (24) | (Healthcare) provider | 13 months | 2014 | InGr | HIV infections averted per 100 patients: 7.9 | CEA, CB | **Treatment costs averted ($):** 378,073 to 542,491  **Cost-benefit ratio ($):** 40 to 57.4 | Sensitivity analysis on HIV transmission rate, disease prevalence, effectiveness and costs. |
| **Treatment** | (41) | (Healthcare) provider | N/I | 2011 | InGr | N/I | CA | **Cost per patient ($):** 64.67 to 71.73 | Sensitivity analysis on staff costs. |
| (43) | (Healthcare) provider | 5 years | 2012 | Micro-costing | N/A | CA | **Cost per patient ($):**  Standard care: 881  Enhanced counselling: 1,018  Enhanced counselling plus mDOT: 1,309 | Scenario analysis on costs |
| (44) | (Healthcare) provider | 1 years | 2009 | InGr | Death incidence (%): -0.42  Patients with undetectable viral load (%): 0.47 | CEA | **ICER ($):** 24,500 per death averted  **ICER ($):** 12,584 per patient with undetectable viral load | Sensitivity analysis (variation in facilities), scenario analysis, and probabilistic sensitivity analysis |
| (45) | (Healthcare) provider | 3 years | 2018 | Micro-costing | HIV viral suppression (%):  Clinic: 63  Community: 74 | CEA | **Cost per person virally suppressed ($):**  Clinic: from 214 to 422  Community: from 275 to 390 | Sensitivity analysis on intention-to-treat and suppression threshold. Subgroup analyses by gender, age and site. |
| [(42)](https://journals.sagepub.com/doi/abs/10.1177/15248399241245059?journalCode=hppa) | (Healthcare) provider | 3 years | 2017 | Micro-costing | Number of users achieving viral suppression:  Health department: 24  Clinic: 23 | CEA | **Total cost ($):**  Health department: 473,156  Clinic: 700,520  **Cost per person virally suppressed ($):**  Health department: 20,632  Clinic: 37,810 | N/I |
| **Prevention, Treatment** | (47) | (Healthcare) provider | 10 years | 2012 | Micro-costing | Increased uptake of PrEP compared with standard care (%): 95  Increased uptake of ART compared with standard care (%): 80  Incremental HIV infections averted in 10 years (%): 43  Incremental DALYs averted (%): 62 | CEA, CU | **Total cost - PrEP programme ($):** 363,012  **Cost of PrEP per couple ($):** 408  **ICER - PreP+ART ($):** 1,340 per infection averted  **ICER - ART alone ($):** 1,452 per infection averted  **ICER ($):** 5,354 per DALY averted | Sensitivity analysis (adherence)  Simulation of cost-effectiveness on a national scale. |
| **Prevention, Screening** | (46) | (Healthcare) provider | 3 months | 2015 | FC | Adherence to risk reduction strategies (%): 47.7 to 78.8 | CEA | **Cost per outreach ($):** 14  **Cost per MSM at risk adhering to the campaign message ($):** from 181 to 272 | Sensitivity analysis on cost assumptions, effectiveness, and behavioural uncertainty |
| **Screening** | (28) | (Healthcare) provider | 24 months | 2007 | InGr | Number of new diagnoses: 11 to 13 per site | CEA | **Cost per new HIV diagnosis notified ($):** from 11,578 to 16,437 | N/I |
| (34) | (Healthcare) provider | 12 months | 2010 | InGr | Uptake of HIV counselling and testing: 37% vs 16% | CEA | **Total annual costs ($):** 233,239 vs 146,615  **Cost per client tested ($):** 29 vs 38  **ICER ($):** 19 per additional client tested | Sensitivity analysis on discount rates, nurse salaries, population size, and HIV test kit costs |
| (39) | (Healthcare) provider | 4 weeks | 2019 | Micro-costing | Number of pregnant women reached with HIVST Kits: 500  Number of male partners tested: N/I | CEA | **Cost per woman ($):** 14   **Cost per male tested** **($):**  11.9 (HIV+), 10.6 (HIV−) | Scenario analysis on scale |
| (32) | (Healthcare) provider | 12 months | 2016 | Micro-costing | Number of self-tests completed: 7368  Number of persons tested: 3090  Number of new HIV diagnoses: 59 vs 11  HIV transmissions averted: 3.3  QALYs saved: 14.86 | CEA, CU | **Total programme cost ($):** 449,510  **Cost per self-test completed ($):** 61  **Cost per person tested ($):** 145  **Incremental cost per new HIV diagnosis ($):** 9,365  **Cost per HIV transmission averted ($):** 134,583  **Cost per QALY saved ($):** 74,476 | Sensitivity analysis on programme duration, scale-up, number of diagnoses, and cost per test kit |
| (36) | (Healthcare) provider |  | 2016 | InGr | New HIV diagnosis rate (%): 5 to 7.2 | CEA | **Total programme cost ($):**  2,767,481 (RS); 491,347 (MPS); 580,260 (SN)  **Cost per test ($):**  48 (RS); 2,857 (MPS); 1,142 (SN)  **Cost per HIV-positive test ($):**   7,687 (RS); 6,219 (MPS); 2,763 (SN)  **Cost per new diagnosis ($):**  16,773 (RS); 61,418 (MPS); 15,683 (SN**)** | Sensitivity analysis on HIV prevalence rates. |
| (38) | (Healthcare) provider | 1 year | 2020 | Top-down | Number of HIVST kits distributed: 19,155  Clients self-tested: 91%  Clients with reactive results: 3.62%  Clients confirmed HIV positive: 96%  Clients initiating ART: 83% | CEA | **Total program cost ($):** 330,070  **Cost per kit distributed ($):** 17.2  **Cost per client tested ($):** 18.9  **Cost per reactive test ($):** 521.5  **Cost per confirmed positive ($):** 550.8  **Cost per ART initiation ($):** 708.6 | Sensitivity analysis and scenario analysis |
| (40) | Payer | 1 year | 2018 | Micro-costing | HIV tests administered to new family planning clients: 36,085 | CA | **Total program cost ($):** 91,994  **Average costs per new family planning client ($):** 2.55 | Sensitivity analysis on the number of clients and scenario analysis |
| (31) | (Healthcare) provider | 21 months | 2021 | Top-down and bottom-up | Kits distributed: 16,001  Testing sessions conducted: 32,194 | CEA | **Cost per kit at programme level ($):** from12 to 286  **Cost per kit at site level ($):** from 4 to 26  **Cost per session ($):** from 7 to 8  **Cost per HIV diagnosis ($):**from 72 to 705 | Sensitivity analysis on service and programme duration |
| (27) | (Healthcare) payer | 12 months | 2019 | Micro-costing | Number of male sex partners traced: 2075; tested: 1632; diagnosed HIV-positive: 668; and initiated on ART: 487. | CEA | **Average unit costs per male sex partners ($):** Traced: 34.5  Tested: 42.5  HIV-positive: 108.7  On ART: 152.3 | Scenario analysis (NGO vs MOH budget) |
| (33) | (Healthcare) provider | 12 months | 2018/2019 | Micro-costing | Number of HIVST kits distributed: 14,473  Other outcomes, but not included in the economic evaluation | CA | **Cost per kit distributed ($):** from 7.90 to 14.80 | N/A |
| (37) | (Healthcare) provider | 13 months | 2019 | Budget and activity-based | Number of shops visited: N/I | CA | **Annual implementation costs ($):** 20,142  **Cost per visit ($):** 232 | N/A |
| (23) | Societal perspective (includes healthcare system and client) | Up to 5 years | 2022 | Micro-costing | HIV positivity rate: 2.3% (FSW) to 13.58% (MSM)  Confirmatory testing uptake: 46.42% (FSW) to 62.11% (MSM)  ART initiation among confirmed positives: ~66.87% | CA | **Cost per kit ($):**  FSW: from 35.3 to 98.6  MSM: from 40.4 to 43.3  **Total societal costs ($):** 220,638.91 | Sensitivity analysis and scale-up scenario |
| ART - Antiretroviral therapy, CA - Cost analysis, CB - Cost benefit, CEA - Cost-effectiveness analysis, CU - Cost utility, DALY - Disability-adjusted life year, FC - Full costing approach, HIVST - HIV self-testing, ICER - Incremental cost-effectiveness ratio, InGr - Ingredients approach, mDOT - modified directly observed therapy, MOH - Ministry of health, MPS - Modified partner service, MSM - Men who have sex with men, N/A - Not applicable, N/I - Not informed, NGO - Non-governmental organization, PrEP - Pre-exposition prophylaxis, QALY - Quality-adjusted life year, RS - Routine screening, SN - Social networking | | | | | | | | | |
