# Supplementary material
Source: Research Square preprint supplement (doi:10.21203/rs.3.rs-9283682/v1)
Supplement: Supplementary file 3 [file 7cb8d2057cb6ef2bd1032f42.docx]

| **Citation** | **Score** | **Classification** |
| --- | --- | --- |
| Holmes et al | 10 | Good |
| Torres-Rueda | 10 | Good |
| TERRIS-PRESTHOLT | N/A | N/A |
| Wall | 9 | Good |
| Roberts | N/A | N/A |
| Chandrashekar et al | N/A | N/A |
| Page | N/A | N/A |
| Lightner | 7 | Average |
| Rasu | N/A | N/A |
| Barto | 10 | Good |
| Barnabas | 10 | Good |
| Frey | 7 | Average |
| Ying | 10 | Good |
| Skaathun | 8.5 | Good |
| Wamuti | 9 | Good |
| Phillips | N/A | N/A |
| Shrestha | 6.5 | Average |
| Putri | 8 | Good |
| McGee | 9 | Good |
| Bulterys | 9.5 | Good |
| Traore | 10 | Good |
| Shrestha | 10 | Good |
| Zishiri | 7 | Average |
| Thomas | 9 | Good |
| Tabana et al | 9 | Good |
