# Supplementary material
Source: Research Square preprint supplement (doi:10.21203/rs.3.rs-9283682/v1)
Supplement: Supplementary file 4 [file bf5737573edd7b65b886938d.docx]

**Appendix 2 – Implementation strategies classified according to the ERIC project refined compilation**

| **Implementation strategy category** | **Implementation strategy** | **Citation** |
| --- | --- | --- |
| Engage patients/  service users | Intervene with patients/consumers to enhance uptake and adherence | (24–28,30,33,36,38,39,41,43,46,47) |
| Involve patients/consumers and family members | (25,27,28,32,36) |
| Use mass media | (25,30,32,46) |
| Develop  stakeholder  interrelationships | Build a coalition | (26,31,33) |
| Promote network weaving | (27,28,36) |
| Identify and prepare champions | (23,25) |
| Recruit, designate, and train for leadership | (34,38,45) |
| Capture and share local knowledge | (31) |
| Develop academic partnerships | (44) |
| Use evaluative and  iterative strategies | Stage implementation scale-up | (29,32,39,41,43,47) |
| Audit and provide feedback | (37) |
| Develop and organise quality monitoring systems | (34,40) |
| Develop a formal implementation blueprint | (29,40) |
| Train and educate stakeholders | Conduct ongoing training | (29,30,34,38,42,45) |
| Distribute educational materials | (24,29,32,34,45,46) |
| Conduct educational outreach visits | (26,44) |
| Develop educational materials | (29,34,44) |
| Change  Infrastructure | Change service sites | (29,31,34,38,40) |
| Mandate change | (35,36) |
| Change physical structure and equipment | (24,25,45) |
| Change accreditation or membership requirements | (37) |
| Start a dissemination organisation | (32) |
| Utilise financial  Strategies | Use capitated payments | (28,36) |
| Fund and contract for the clinical innovation | (29,42) |
| Alter patient/consumer fees | (46) |
| Provide interactive  Assistance | Facilitation | (29,31,34,39) |
| Centralize technical assistance | (23,29,31,34,45) |
| Support clinicians | Create new clinical teams | (29,32,38,45) |
| Revise professional roles | (34,44,45) |
| Adapt and tailor  to context | Tailor strategies | (24,29,34,45) |
